# Supplementary material for: A general strategy of decorating 3D carbon nanofiber aerogels derived from bacterial cellulose with nano-Fe3O4for high-performance flexible and binder-free lithium-ion battery anodes
Source: Royal Society of Chemistry journal article supplement (doi:10.1039/c5ta03688g), 2015-01-01
Supplement: c5ta03688g1.pdf [file c5ta03688g1.pdf]

## Supporting Information

### **General strategy of decorating 3D carbon nanofiber aerogel derived from bacterial cellulose with nano-Fe<sub>3</sub>O<sub>4</sub> for high-performance flexible and binder-free lithium-ion battery anodes**

Yizao Wan,<sup>ab</sup> Zhiwei Yang,<sup>b</sup> Guangyao Xiong,<sup>\*a</sup> and Honglin Luo<sup>\*b</sup>

<sup>a</sup> *School of Mechanical and Electrical Engineering, East China Jiaotong University, Nanchang 330013, China*

<sup>b</sup> *School of Materials Science and Engineering, Tianjin Key Laboratory of Composite and Functional Materials, Key Laboratory of Advanced Ceramics and Machining Technology, Ministry of Education, Tianjin University, Tianjin 300072, China*

Corresponding authors.

E-mail addresses: xiongguangyao@163.com (G. Xiong), hlluotju@126.com (H. Luo)

## **Experimental section**

### **Preparation of nano-Fe<sub>2</sub>O<sub>3</sub>-decorated BC aerogels**

The preparation and cleaning procedures of BC pellicles were identical to those described in our previous work.<sup>1</sup> The resulting BC pellicles were freeze-dried in liquid nitrogen (-196 °C) to obtain BC aerogels. The nano-Fe<sub>2</sub>O<sub>3</sub>-decorated BC aerogels were synthesized by the hydrothermal method. Typically, a BC aerogel (25 × 25 × 1 mm<sup>3</sup>) was immersed in 50 mL of 0.05 M Fe(NO<sub>3</sub>)<sub>3</sub>•9H<sub>2</sub>O aqueous solution for 48 h at room temperature. Next, the BC aerogel was immersed in 40 mL of 0.5 M urea aqueous solution under agitation, and subsequently transferred to a closed container at 120 °C for 10 h. The product was taken out and freeze-dried, resulting in a nano-Fe<sub>2</sub>O<sub>3</sub>-decorated BC aerogel, which was named as Fe<sub>2</sub>O<sub>3</sub>-BC-05. Other nano-Fe<sub>2</sub>O<sub>3</sub>-decorated BC aerogels were synthesized with the same procedure except that the concentration of Fe(NO<sub>3</sub>)<sub>3</sub>•9H<sub>2</sub>O was different, namely 0.1 and 0.2 M. The resultant samples are denoted as Fe<sub>2</sub>O<sub>3</sub>-BC-10 and Fe<sub>2</sub>O<sub>3</sub>-BC-20, respectively.

### **Preparation of Fe<sub>3</sub>O<sub>4</sub>-BC-CNFs**

The as-obtained Fe<sub>2</sub>O<sub>3</sub>-BC aerogels were carbonized in a tube furnace under nitrogen atmosphere. The samples were heated from room temperature to 300 °C at a heating rate of 1 °C min<sup>-1</sup>, held for 1 h and then heated to 600 °C at 2 °C min<sup>-1</sup>. The carbonization lasted for 2 h to yield Fe<sub>3</sub>O<sub>4</sub>-BC-CNFs (named as Fe<sub>3</sub>O<sub>4</sub>-BC-CNFs-x, corresponding to Fe<sub>2</sub>O<sub>3</sub>-BC-x, x=05, 10, 20).

### **Preparation of coin cells**

To prepare working electrodes, BC-CNFs and Fe<sub>3</sub>O<sub>4</sub>-BC-CNFs were punched into circular samples with a diameter of 13 mm and vacuum dried at 100 °C for 12 h. The dried samples were directly used to assemble into cells without any additives or binders. For comparison, Fe<sub>3</sub>O<sub>4</sub> nanoparticles (around 10 nm in size) obtained from Sinopharm Chemical Reagent Co., Ltd., Beijing, China, were used to prepare coin cells. Fe<sub>3</sub>O<sub>4</sub> nanoparticles, carbon black, and polyvinylidene fluoride (PVDF) with a mass ratio of 80 : 10 : 10 were mixed into a homogeneous slurry using N-methyl-2-pyrrolidone (NMP) as the solvent. The slurry mixture was coated onto Cu foil followed by vacuum drying at 100 °C for 12 h. The coin cells (CR2032) were fabricated using metallic lithium as the counter electrode, porous polypropylene film (Celgard 2400) as the separator, and 1 M LiPF<sub>6</sub> in ethylene carbonate (EC)–dimethyl carbonate (DMC)–ethylmethyl carbonate (EMC) (1 : 1 : 1 by volume) as the electrolyte. The cell assembly was carried out in an Ar-filled glovebox. Before all electrochemical measurements, cells were aged for 12 h.

### **Electrochemical measurements**

Charge–discharge experiments were performed at a constant current density between 0.005 and 3 V (vs Li<sup>+</sup>/Li) using a BTS-5V10mA battery tester. Cyclic voltammetry (CV) measurement was performed using a CHI 660B electrochemical workstation at 0.5 mV/s within the range of 0.0–3.0 V (vs Li<sup>+</sup>/Li). For the electrochemical impedance spectroscopy (EIS) measurements, the excitation voltage applied to the cell was 5 mV and the frequency ranges from 0.01 Hz to 100 kHz.

## Characterization

Samples were characterized by scanning electron microscopy (SEM, Nova Nanosem 430), transmission electron microscopy (TEM, Tecnai G2F-20), and X-ray diffraction (XRD, Rigaku D/Max 2500 v/pc) with Cu K $\alpha$  radiation. Thermogravimetric analysis (TGA) was performed on a simultaneous TGA/DSC analyzer (STA449F3) from 30 to 800 °C at a heating rate of 10 °C/min in air. Fourier transformed infrared spectroscopy (FTIR) analysis was conducted by Shimadzu IRPrestige-21 (Japan) and FTIR spectra were recorded in a spectral range of 4000-400 cm<sup>-1</sup> with a resolution of 4 cm<sup>-1</sup>. Raman spectra were recorded by an RM2000 spectrometer (Renishaw Co.). XPS analysis was performed by an X-ray photoelectron spectrometer (Thermo ESCALAB 250Xi, Thermo Fisher Scientific Inc., Waltham, MA, USA). Conductivity measurements were carried out on a Keithley 2635 sourcemeter unit as previously reported.<sup>2</sup> Nitrogen adsorption isotherms and the Brunauer–Emmett–Teller (BET) surface area of Fe<sub>3</sub>O<sub>4</sub>-BC-CNFs were measured at 77 K with a surface area analyzer (W-BK132F, Beijing JWGB Sci. & Tech., China).

## Notes and references

1. Y. Z. Wan, Y. Huang, C. D. Yuan, S. Raman, Y. Zhu, H. J. Jiang, F. He and C. Gao, *Mater. Sci. Engin. C*, 2007, **27**, 855-864.
2. H. Si, H. Luo, G. Xiong, Z. Yang, R. S. Raman, R. Guo and Y. Wan, *Macromol. Rapid Commun.*, 2014, **35**, 1706-1711.

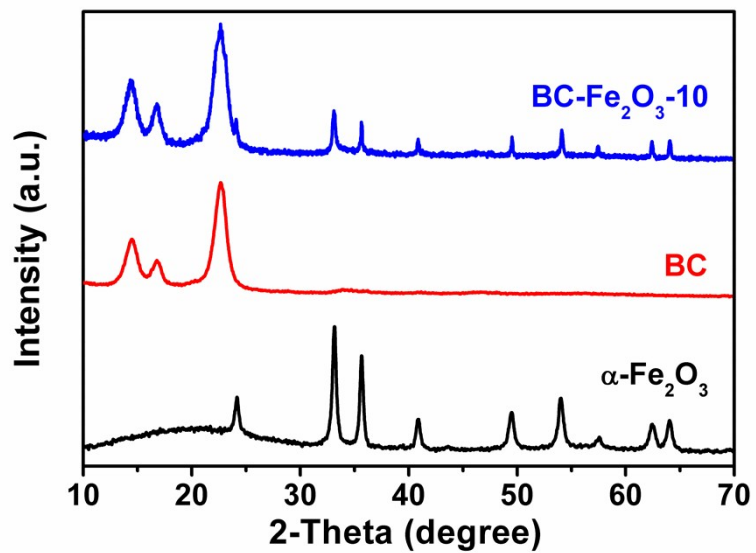

Fig. S1 The XRD patterns of  $\alpha$ -Fe<sub>2</sub>O<sub>3</sub>, BC, and Fe<sub>2</sub>O<sub>3</sub>-BC-10.

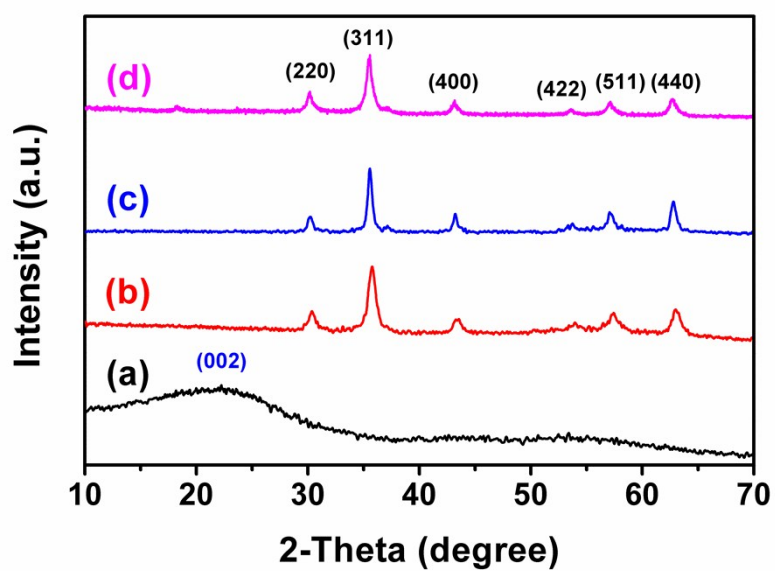

Fig. S2 XRD patterns of BC-CNFs (a), Fe<sub>3</sub>O<sub>4</sub>-BC-CNFs-05 (b), Fe<sub>3</sub>O<sub>4</sub>-BC-CNFs-10 (c), and Fe<sub>3</sub>O<sub>4</sub>-BC-CNFs-20 (d).

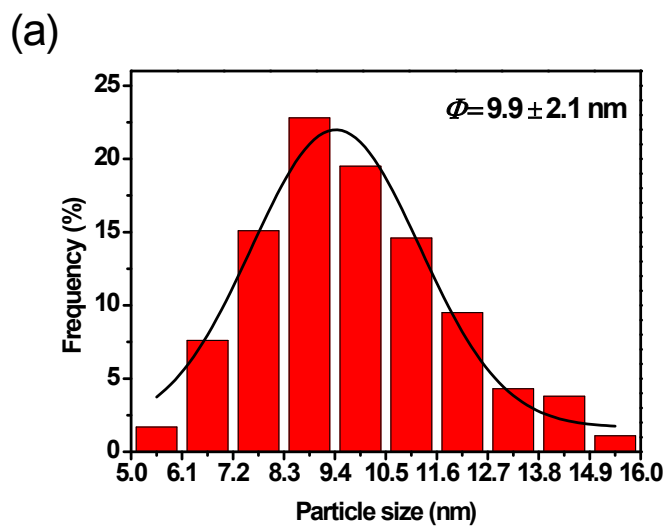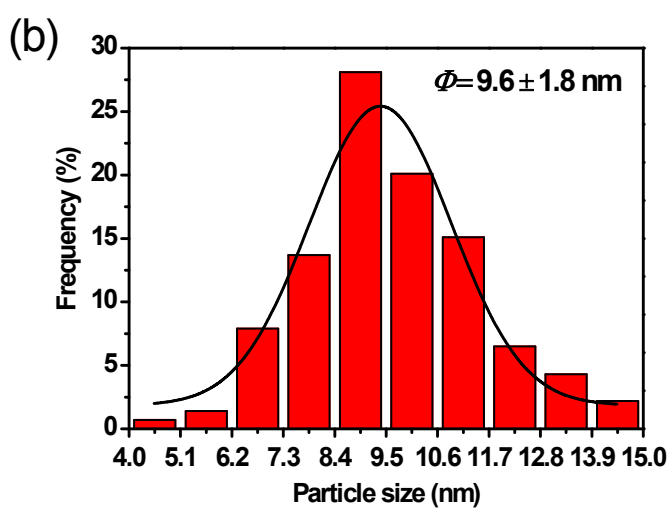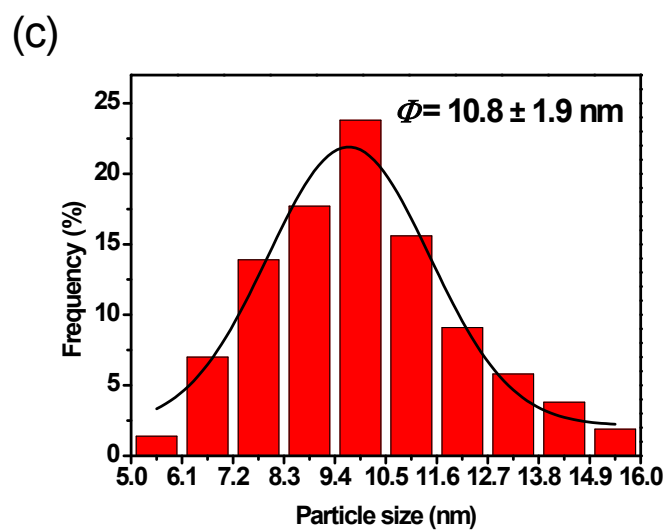

**Fig. S3** Particle size distribution of  $\text{Fe}_3\text{O}_4$  nanoparticles on the surface of  $\text{Fe}_3\text{O}_4$ -BC-CNFs-05 (a),  $\text{Fe}_3\text{O}_4$ -BC-CNFs-10 (b), and  $\text{Fe}_3\text{O}_4$ -BC-CNFs-20 (c) ( $p > 0.05$  when any two materials are compared).

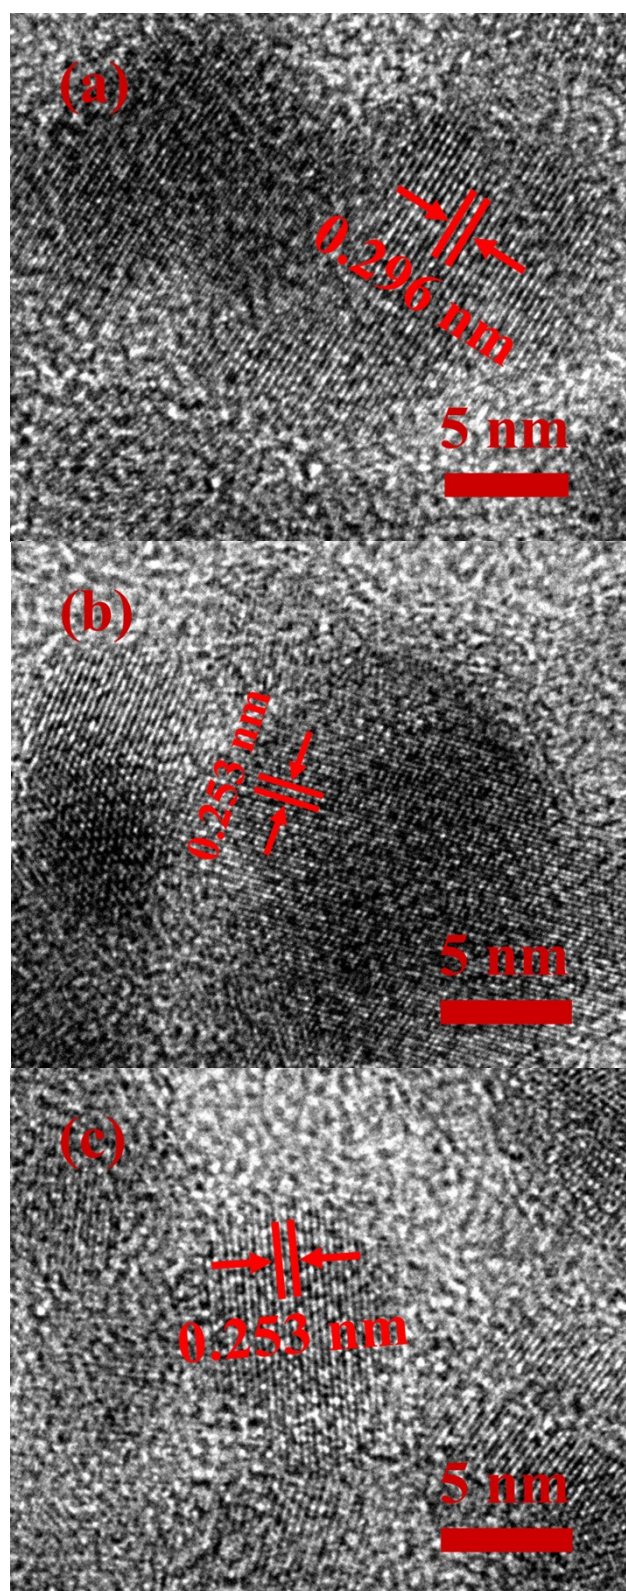

**Fig. S4** HRTEM images of  $\text{Fe}_3\text{O}_4\text{-BC-CNFs-05}$  (a),  $\text{Fe}_3\text{O}_4\text{-BC-CNFs-10}$  (b), and  $\text{Fe}_3\text{O}_4\text{-BC-CNFs-20}$ , showing lattice fringe with a spacing of 0.253 nm.

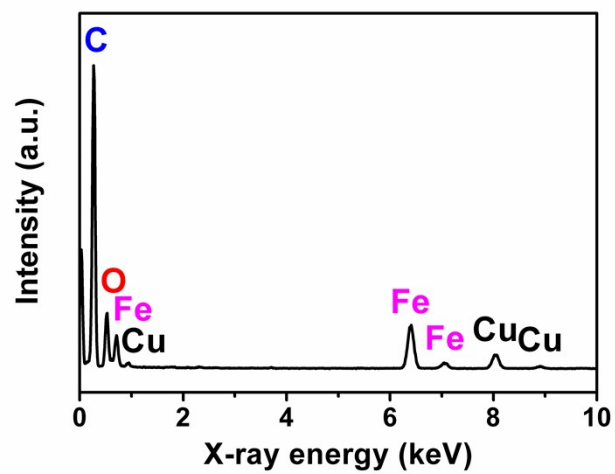

**Fig. S5** EDX pattern of  $\text{Fe}_3\text{O}_4\text{-BC-CNFs}$ .



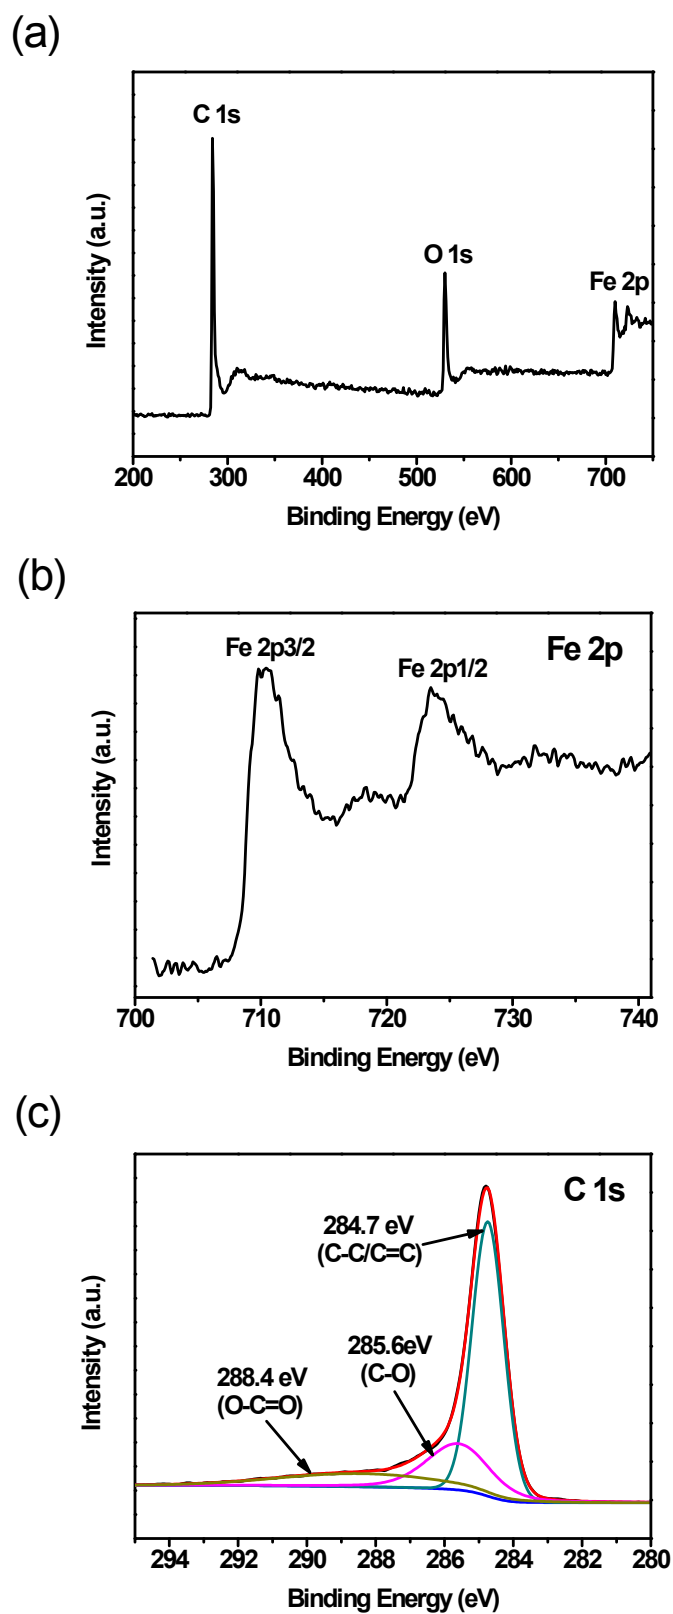

**Fig. S6** X-ray photoelectron spectroscopy (XPS) spectra of wide scan (a), Fe 2p peaks (b), and C 1s peaks of Fe<sub>3</sub>O<sub>4</sub>-BC-CNFs.

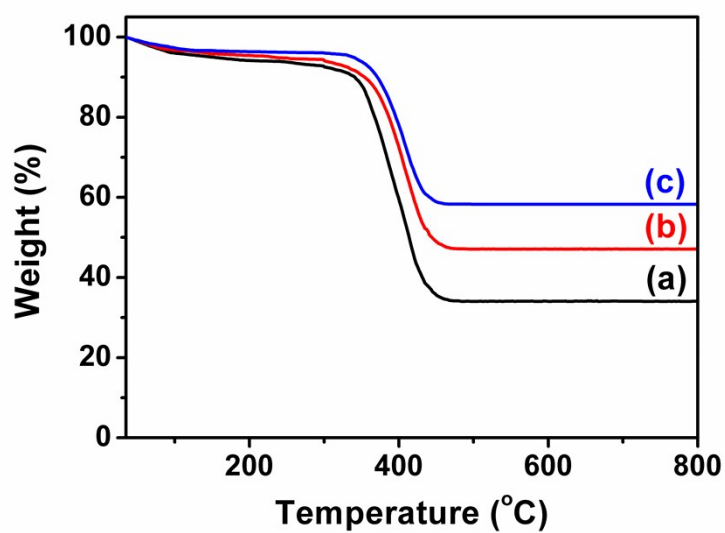

**Fig. S7** TG curves of  $\text{Fe}_3\text{O}_4$ -BC-CNFs-05 (a),  $\text{Fe}_3\text{O}_4$ -BC-CNFs-10 (b), and  $\text{Fe}_3\text{O}_4$ -BC-CNFs-20 (c).

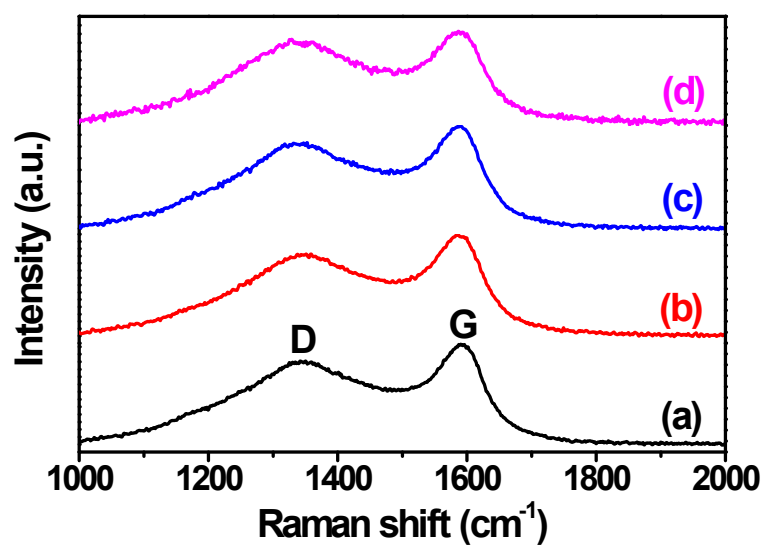

**Fig. S8** Raman spectra of BC-CNFs (a),  $\text{Fe}_3\text{O}_4$ -BC-CNFs-05 (b),  $\text{Fe}_3\text{O}_4$ -BC-CNFs-10 (c), and  $\text{Fe}_3\text{O}_4$ -BC-CNFs-20 (d).

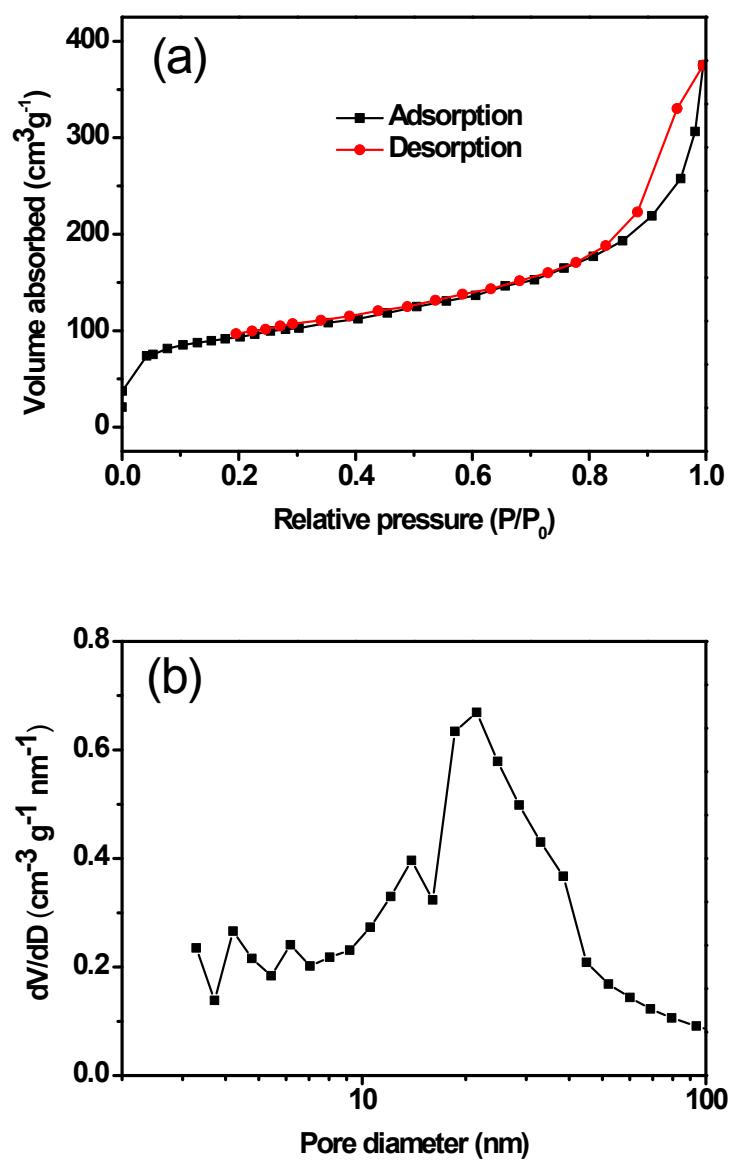

**Fig. S9** Nitrogen adsorption and desorption isotherm (a) and pore-size distribution (b)

of Fe<sub>3</sub>O<sub>4</sub>-BC-CNFs-10 (the Brunauer-Emmett-Teller specific surface area was

calculated to be 322 m<sup>2</sup> g<sup>-1</sup>).

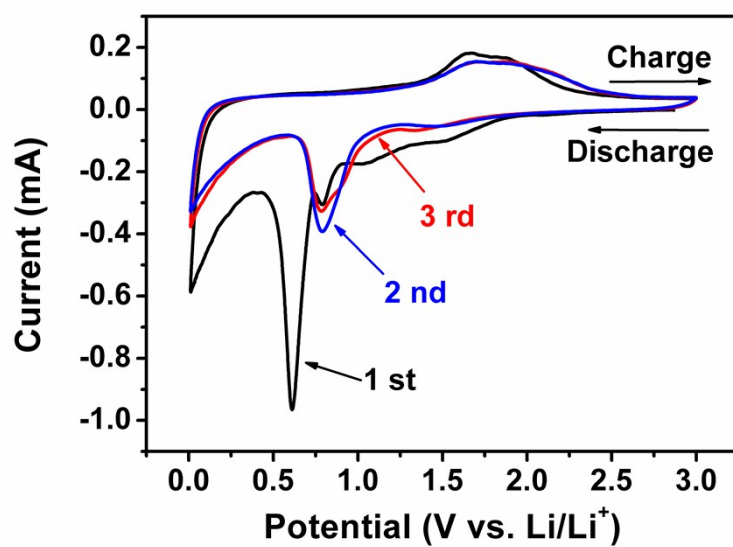

**Fig. S10** Cyclic voltammetry (CV) curves of Fe<sub>3</sub>O<sub>4</sub>-BC-CNFs during the first three cycles.

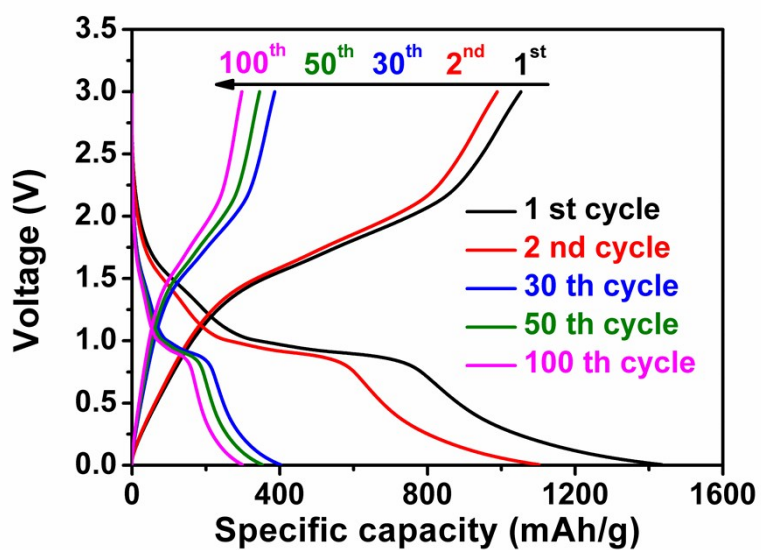

**Fig. S11** Discharge/charge profiles of bare Fe<sub>3</sub>O<sub>4</sub> nanoparticles.

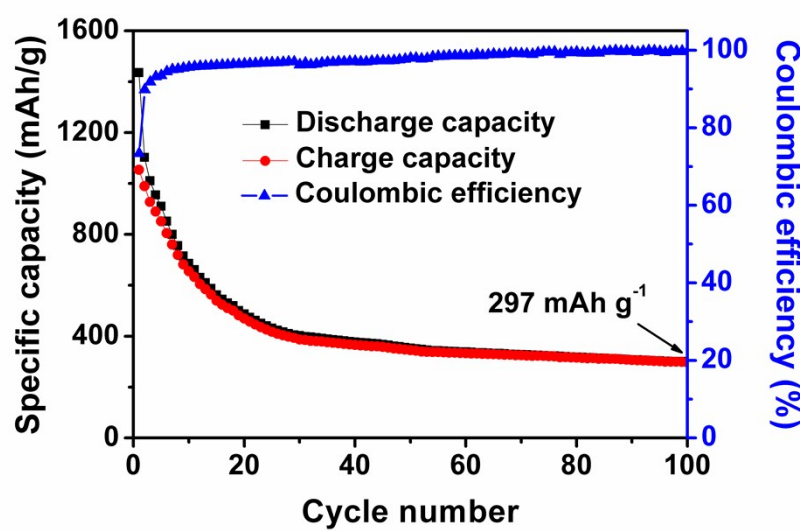

**Fig. S12** Charge and discharge capacities with Coulombic efficiency as a function of cycle number of bare Fe<sub>3</sub>O<sub>4</sub> nanoparticles at a current density 100 mA g<sup>-1</sup>.

**Table S1** *R* values of bare BC-CNFs and Fe<sub>3</sub>O<sub>4</sub>-BC-CNFs.

| Samples                                    | D peak (cm <sup>-1</sup> ) | G peak (cm <sup>-1</sup> ) | <i>R</i> |
|--------------------------------------------|----------------------------|----------------------------|----------|
| Bare BC-CNFs                               | 1342                       | 1590                       | 0.80     |
| Fe <sub>3</sub> O <sub>4</sub> -BC-CNFs-05 | 1339                       | 1589                       | 0.81     |
| Fe <sub>3</sub> O <sub>4</sub> -BC-CNFs-10 | 1338                       | 1588                       | 0.85     |
| Fe <sub>3</sub> O <sub>4</sub> -BC-CNFs-20 | 1329                       | 1587                       | 0.88     |

**Table S2** Relevant parameters of Fe<sub>3</sub>O<sub>4</sub>-BC-CNFs-10 and bare Fe<sub>3</sub>O<sub>4</sub> under different conditions.

| Samples                                    | Conditions                    | <i>R<sub>f</sub></i> (Ω) | <i>R<sub>ct</sub></i> (Ω) |
|--------------------------------------------|-------------------------------|--------------------------|---------------------------|
| Fe <sub>3</sub> O <sub>4</sub> -BC-CNFs-10 | Before rate performance tests | 23.0                     | 136.2                     |
|                                            | After rate performance tests  | 8.6                      | 106.3                     |
| Bare Fe <sub>3</sub> O <sub>4</sub>        | Before rate performance tests | 39.8                     | 361.9                     |
